# Supplementary material
Source: PubMed Central journal article supplement (PMC4109263)
Supplement: NIHMS504958-supplement-Supplementary_Table_1_.pdf [file NIHMS504958-supplement-Supplementary_Table_1_.pdf]

**Supplemental Table 1. Estimated Energy Balance of Dam, Including Milk Energy Production**

|                                                                   | LF-Ln           | HF-Ln             | HF-Ob              |
|-------------------------------------------------------------------|-----------------|-------------------|--------------------|
| <i>n</i>                                                          | 4               | 8                 | 8                  |
| <b>Litter growth (g/day)</b>                                      | <b>2.6±0.4</b>  | <b>3.9±1.0</b>    | <b>2.2±0.3</b>     |
| FFM                                                               | 2.3±0.3         | 3.1±0.7           | 1.7±0.2            |
| FM                                                                | 0.3±0.05        | 0.5±0.1           | 0.3±0.04           |
| <b><sup>a</sup> Energy deposited for litter growth (kcal/day)</b> | <b>5.5±0.8</b>  | <b>8.4±1.9</b>    | <b>4.7±0.6 ‡</b>   |
| FFM growth                                                        | 2.5±0.4         | 3.4±0.8           | 1.9±0.2            |
| FM growth                                                         | 3.2±0.5         | 5.1±1.2           | 2.8±0.4            |
| <b>Litter TEE (kcal/day)</b>                                      | <b>16.6±1.3</b> | <b>21.9±1.3 †</b> | <b>18.4±1.6 ‡</b>  |
| <b><sup>b</sup> Estimated Milk Energy (kcal/day)</b>              | <b>22.2±2.4</b> | <b>30.4±1.8 †</b> | <b>23.1±2.0 ‡</b>  |
| <b>Dam TEE (kcal/day)</b>                                         | <b>15.4±0.9</b> | <b>10.6±0.7 †</b> | <b>12.5±1.2 †‡</b> |
| <b>Dam EI (kcal/day)</b>                                          | <b>36.0±2.3</b> | <b>41.8±2.6 †</b> | <b>47.2±2.8 †</b>  |
| <b><sup>c</sup> Estimated Dam EB (kcal/day)</b>                   | <b>-1.1±3.7</b> | <b>0.7±2.5</b>    | <b>11.4±1.6 †‡</b> |

† = LF-Ln vs. HF-Ln or HF-Ob  $p < 0.05$ ; ‡ = HF-Ln vs. HF-Ob  $p < 0.05$

<sup>a</sup> Energy deposited = (FM x 9.25) + ((FFM x 5.65) x 0.195)

<sup>b</sup> Estimated Milk Energy = (<sup>a</sup>Estimated energy deposited) + (Litter TEE)

<sup>c</sup> Dam EB = Dam EI - (Dam TEE + <sup>a</sup>Estimated Milk Energy)
